# Supplementary material for: Temperature-induced one-dimensional chiral Ag(i) linear chains and left-handed 21 helices: DFT studies, luminescence and SHG response
Source: Royal Society of Chemistry journal article supplement (doi:10.1039/c4ce01601g), 2014-01-01
Supplement: c4ce01601g1.pdf [file c4ce01601g1.pdf]

**ELECTRONIC SUPPLEMENTARY DATA**

for

**Temperature-induced one-dimensional chiral Ag(I) linear chain and left-handed  $2_1$  helix: DFT studies, luminescence and SHG response**

Lin Cheng,<sup>a,b,\*</sup> Jun Wang,<sup>a,b</sup> Qi Qi,<sup>a</sup> Xiuying Zhang,<sup>a</sup> Hai-Yan Yu,<sup>a</sup> Shaohua Gou<sup>a,b\*</sup> and Lei Fang<sup>a,b</sup>

<sup>a</sup> Pharmaceutical Research Center, School of Chemistry and Chemical Engineering, Southeast University, Nanjing 211189, China

<sup>b</sup> Jiangsu Province Hi-Tech Key Laboratory for Bio-medical Research, Southeast University, Nanjing 211189, China

E-mail: [lcheng@seu.edu.cn](mailto:lcheng@seu.edu.cn); [sgou@seu.edu.cn](mailto:sgou@seu.edu.cn)

## 1. Procedure of the synthesis of (1*R*,2*R*)-3-bcpb

The mixture of (1*R*,2*R*)-2,3-pcd (1.48 g, 5 mmol), benzoyl chloride (1.69 g, 11 mmol), triethylamine (0.76 g, 7.5mmol) and toluene (50 mL) was refluxed for 15 hours. Then saturated NaCl solution (50 mL) was added to the cooled reaction. The layers were separated and the organic layer was dried over anhydrous MgSO<sub>4</sub>, filtered and evaporated to give yellow oils. Water (80 mL) and ether (20 mL) were added to the oils and the mixture was refluxed for 3 hours, then cooled and white solids were precipitated. After washed by water and ether, the white products were collected and dried. Yiled: 54% (1.36 g). Anal. Calcd. (%) for C<sub>32</sub>H<sub>32</sub>N<sub>4</sub>O<sub>2</sub>: C 76.16, H 6.39, N 11.10; found: C 76.14, H 6.42, N 11.12. ESI MS: m/z: 505.26 [M+H]<sup>+</sup>, 527.24 [M+Na]<sup>+</sup>, 1031.49 [2M+Na]<sup>+</sup>. ESI-MS spectrum of (1*R*,2*R*)-3-bcpb was shown as the following:

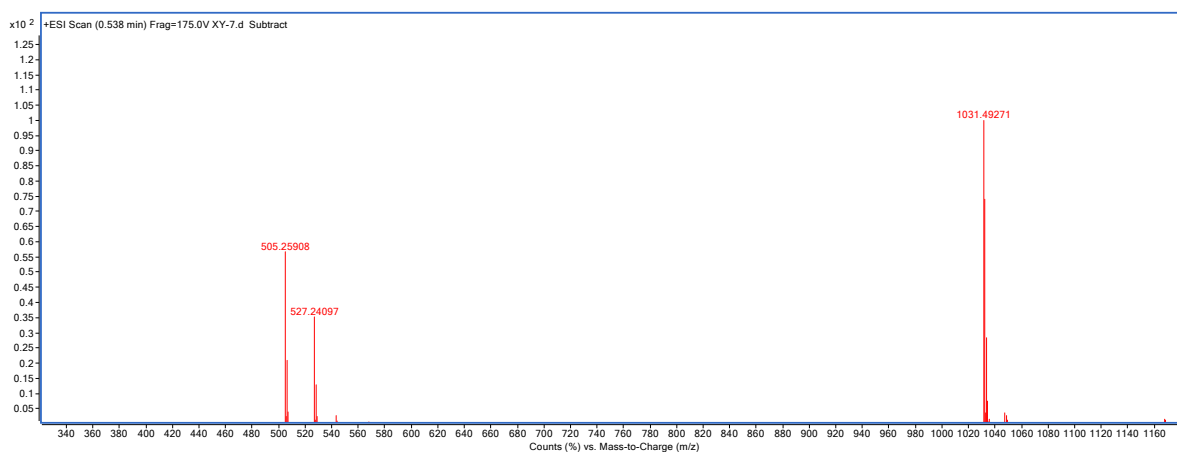

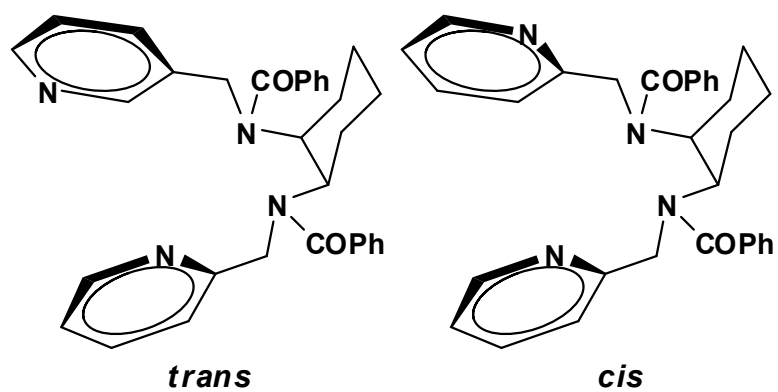

Scheme S1 The *trans*- and *cis*- isomers of (1*R*,2*R*)-3-bcpb.

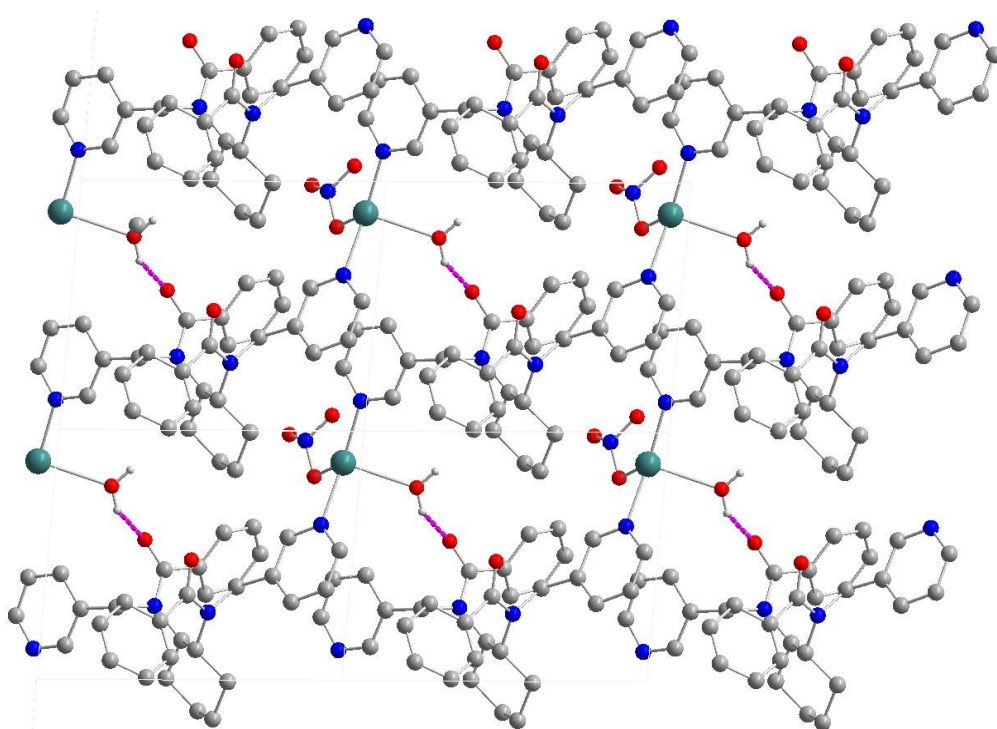

Fig. S1 The 2D hydrogen bonding network along the *ac* plane via interchain O-H $\cdots$ O hydrogen bonds in **1a**.

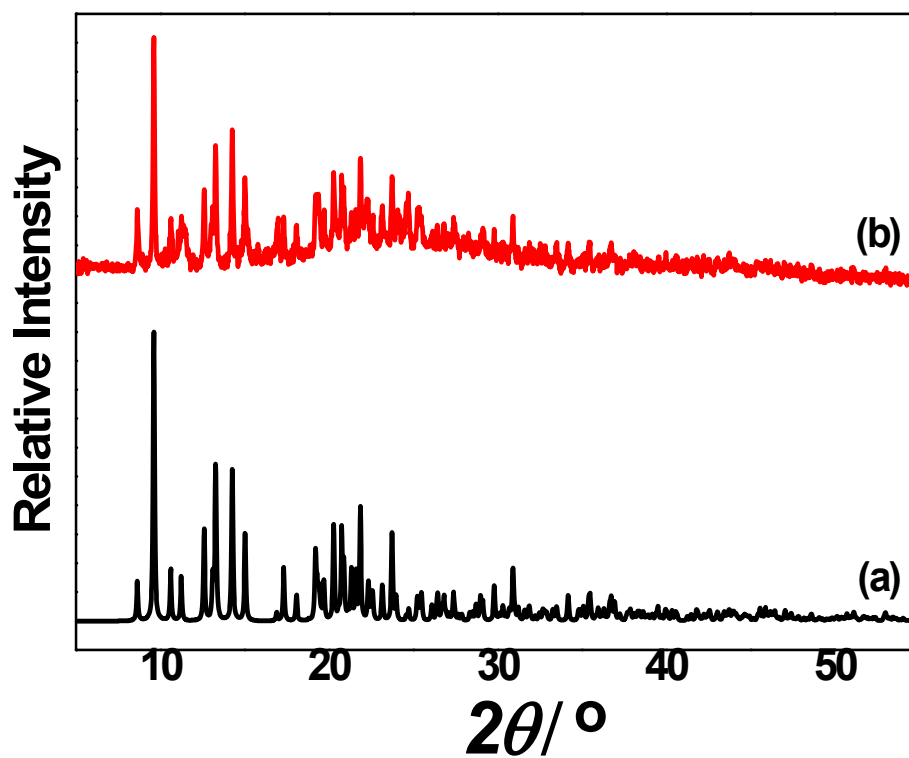

Fig. S2 The XRD patterns of **1a**, simulated from X-ray single crystal data (a) and polycrystalline as newly synthesized (b).

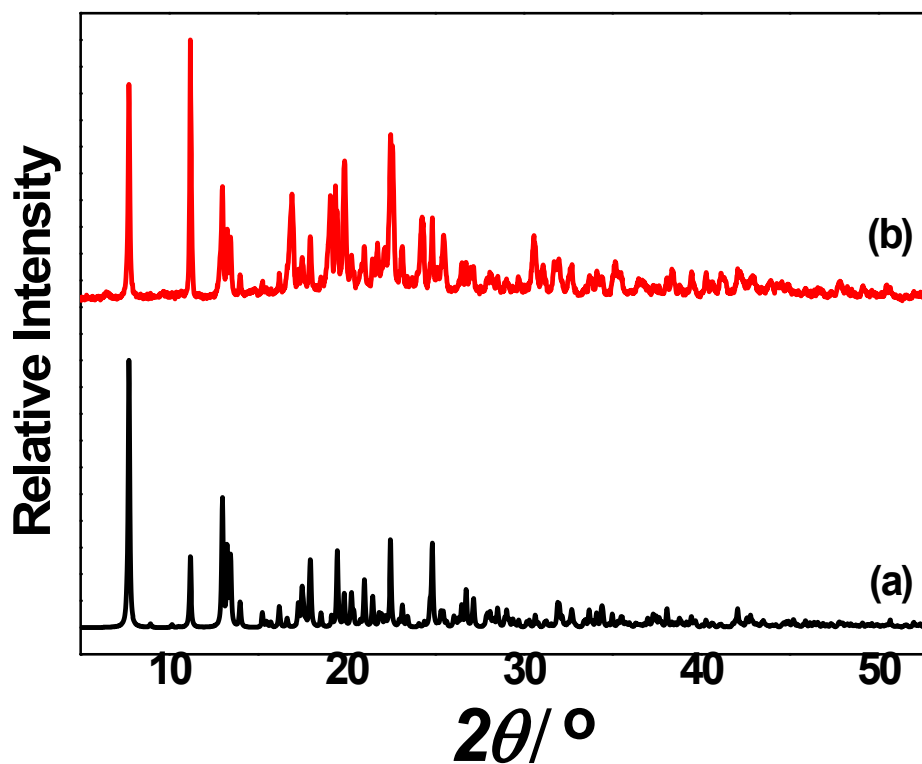

Fig. S3 The XRD patterns of **2a**, simulated from X-ray single crystal data (a) and polycrystalline as newly synthesized (b).

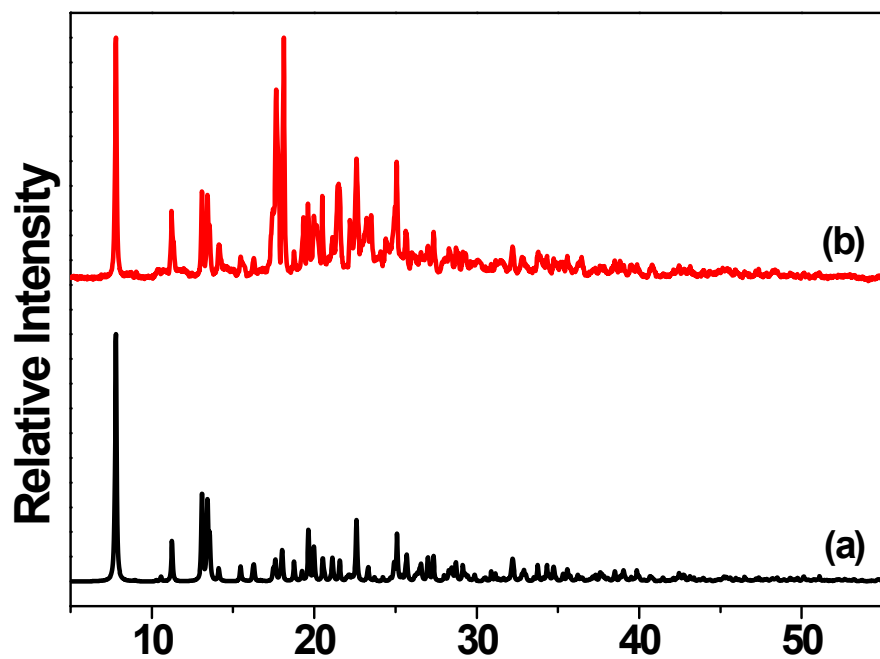

**Fig. S4** The XRD patterns of **1b**, simulated from X-ray single crystal data (a) and polycrystalline as newly synthesized (b).

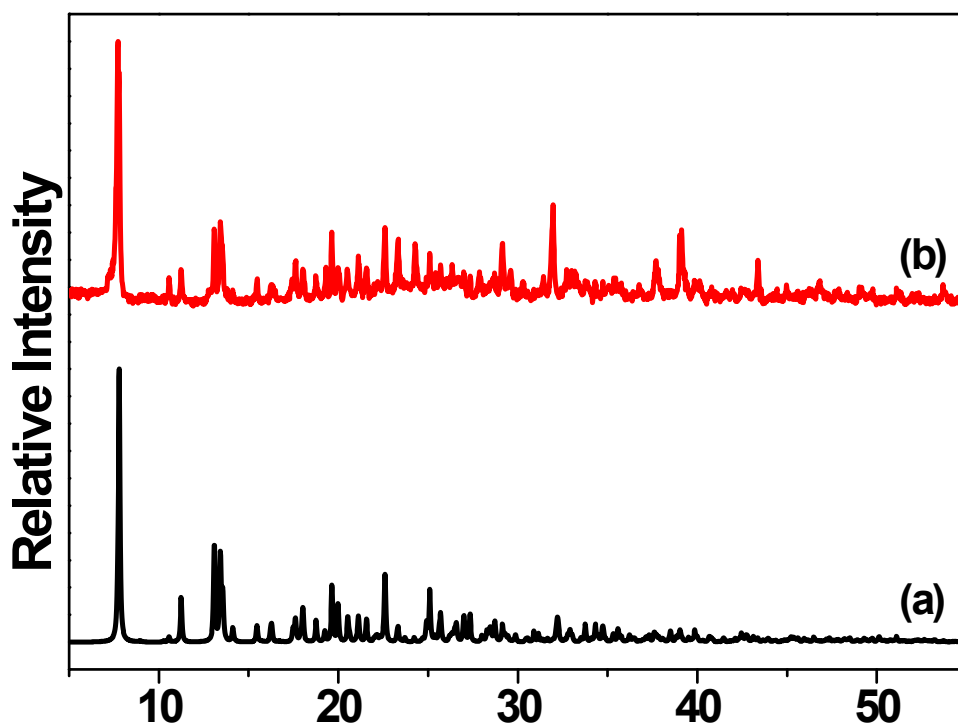

**Fig. S5** The XRD patterns of **2b**, simulated from X-ray single crystal data (a) and polycrystalline as newly synthesized (b).

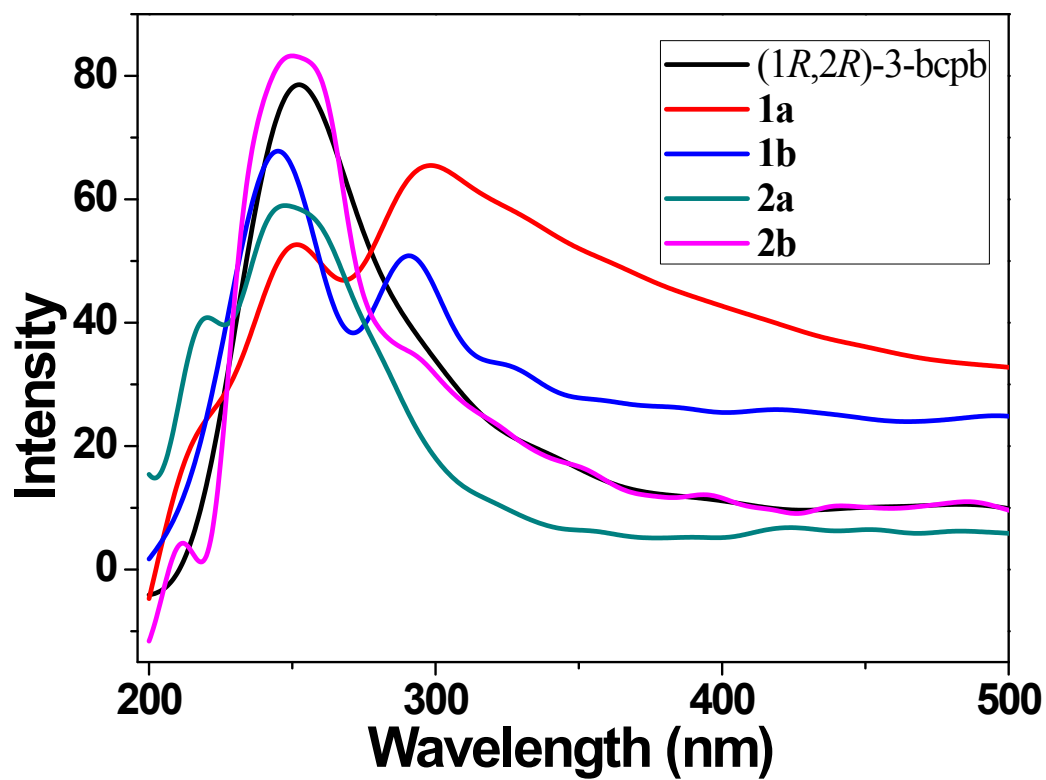

Fig. S6 CD spectra of (1R,2R)-3-bcpb and the four CCPs in the solid state at room temperature.

**Table S1.** Selected bond lengths (Å) and angles (°) for **1a**, **2a**, **1b** and **2b**.

---

| <b>1a</b>   |            |            |           |
|-------------|------------|------------|-----------|
| Ag1-O1W     | 2.613(8)   | Ag1-N1     | 2.233(11) |
| Ag1-O5      | 2.632(13)  | Ag1-N4a    | 2.258(12) |
| O1W-Ag1-O5  | 107.1(4)   | O5-Ag1-N1  | 120.8(4)  |
| O1W-Ag1-N1  | 92.5(4)    | O5-Ag1-N4a | 84.0(4)   |
| O1W-Ag1-N4a | 91.1(3)    | N1-Ag1-N4a | 152.4(4)  |
| <b>2a</b>   |            |            |           |
| Ag1-N1      | 2.165(5)   | Ag1-N4b    | 2.147(5)  |
| N1-Ag1-N4b  | 167.55(19) |            |           |
| <b>1b</b>   |            |            |           |
| Ag1-O1W     | 2.648(9)   | Ag1-N4b    | 2.171(11) |
| Ag1-N1      | 2.193(12)  | O1W-Ag1-N1 | 93.3(4)   |
| O1W-Ag1-N4b | 94.7(4)    | N1-Ag1-N4b | 160.5(4)  |
| <b>2b</b>   |            |            |           |
| Ag1-N1      | 2.181(10)  | Ag1-N4a    | 2.147(9)  |
| N1-Ag1-N4a  | 168.6(4)   |            |           |

---

Symmetry code for **1a**: a, -1+x, y, -1+z; for **2a**: b, 5/2-x, 1-y, 1/2+z; for **1b**: b, 1+x, y, 1+z; for **2b**: a, -3/2-x, -1-y, -1/2+z.

**Table S2.** Selected Hydrogen Bond Lengths (Å) and Bond Angles (°) of **1a**, **2a**, **1b** and **2b**. (D, donor atom; A, acceptor atom).

| D-H···A         | D-H [Å] | H···A [Å] | D···A [Å] | D-H···A [°] |
|-----------------|---------|-----------|-----------|-------------|
| <b>1a</b>       |         |           |           |             |
| O1W-H1WB···O1d  | 0.85    | 2.16      | 2.822(13) | 135         |
| <b>2a</b>       |         |           |           |             |
| O1W-H1WB···O2W  | 0.85    | 1.88      | 2.73(3)   | 174         |
| O2W-H2WA···O3r  | 0.80    | 2.45      | 3.25(2)   | 176         |
| O2W-H2WB···O3Ws | 0.80    | 1.96      | 2.75(4)   | 167         |
| O3W-H3WA···O1   | 0.80    | 1.98      | 2.77(3)   | 171         |
| O3W-H3WB···O1W  | 0.70    | 2.45      | 2.86(4)   | 120         |
| <b>1b</b>       |         |           |           |             |
| O1W-H1WA···O2d  | 0.85    | 1.98      | 2.835(14) | 179         |
| O7-H7B···O1W    | 0.90    | 2.28      | 2.752(14) | 113         |
| <b>2b</b>       |         |           |           |             |
| O1W-H1WA···O2   | 0.85    | 2.20      | 3.049(18) | 179         |
| O1W-H1WB···O2Ws | 0.85    | 2.08      | 2.93(3)   | 177         |
| O2W-H2WA···O3W  | 0.85    | 2.29      | 3.11(3)   | 161         |
| O2W-H2WB···O4c  | 0.85    | 2.28      | 3.13(3)   | 178         |
| O2W-H2WB···O6c  | 0.85    | 2.51      | 3.10(2)   | 128         |
| O3W-H3WB···O1W  | 0.85    | 2.33      | 3.18(3)   | 179         |

Symmetry code for **1a**: d, -1+x, y, z. for **2a**: r, 7/2-x, 2-y, -1/2+; s, 1/2+x, 3/2-y, 1-z. for **1b**: d, x, y, 1+z. for **2b**: c, -1/2+x, -1/2-y, -z; s, -1/2+x, -3/2-y, -z.
